# Supplementary material
Source: bioRxiv or medRxiv preprint supplement (https://www.biorxiv.org/content/biorxiv/early/2019/12/10/869685/DC6/embed/media-6.pdf)
Supplement: Supplementary file [file media-6.pdf]

## Vacuolar-type ATP synthase Gene Report

Rebecca Grace

### Introduction:

Vacuolar-type ATP synthase (V-ATPase) is a highly conserved eukaryotic enzyme (Nelson *et al.* 2000). Originally found in the vacuole membrane, V-ATPase is now known to function in almost every cell's plasma membrane and endomembrane system (Maxson and Grinstein 2014, Hilario and Gogarten 1998). V-ATPase works to regulate the acidity of organelles, such as vacuoles, the Golgi apparatus, and coated vesicles, by translocating protons across their membranes and powering the secondary transport of ions. Structurally, V-ATPase has a noncatalytic transmembrane domain, the V<sub>0</sub> rotor, and a catalytic cytoplasmic domain, the V<sub>1</sub> stator. V-ATPase hydrolyzes ATP into ADP, thus acting opposite of the commonly known F-ATPase (Nelson *et al.* 2000). In insects, typically 13 protein subunits are required to build a single V-ATPase (Badillo-Vargas *et al.* 2014). The V<sub>0</sub> domain consists of subunits a-e and V<sub>1</sub> consists of subunits A-H (Beyenbach and Wieczorek 2006). There is also a critical accessory S subunit that helps assemble the enzyme (Miles *et al.* 2017). Unlike insects, mammals need 14 subunits to build V-ATPase, and they use two copies of accessory S, a protein that does not exist in fungi (Beyenbach and Wieczorek 2006, Miles *et al.* 2017, Forgac 2007). Only fungi have the integral proteolipid subunit c', which is replaced with an additional subunit V<sub>0</sub>-c in eukaryotes (Chavez *et al.* 2006, Maxson and Grinstein 2014). In insects, V-ATPase occurs highly throughout epithelial cells and are especially important in the digestive tract, helping to control an insect's nutrient uptake and solute transport (Dow *et al.* 1997). Many studies have demonstrated the lethality of silencing individual V-ATPase subunits across several phyla, including insects (Nelson *et al.* 2000). In addition, the prolific and fundamental nature of this enzyme makes V-ATPase an attractive potential target for RNAi gene silencing in *Diaphorina citri* (Asian citrus psyllid) towards the future pest control and subsequent prevention of the spread of Citrus greening disease.

### Methods:

The *D. citri* Vacuolar ATP synthase genes were annotated following the guidelines for community annotation described previously (Hosmani et al 2019). Vacuolar ATP synthase insect orthologs from *Acyrtosiphon pisum* (pea aphid) were obtained from the KEGG database. Additional ortholog subunits occurring in non-insect eukaryotes, like *Homo sapiens*, were obtained from HUGO and the non-redundant NCBI Reference Sequence database. V-ATPase protein sequences were used to query the predicted protein set from the *Diaphorina citri* MCOT transcriptome via BLASTp. Reciprocal BLASTp analysis was performed to validate the *D. citri* MCOT significant hits using the NCBI non-redundant protein database. *D. citri* V-ATPase subunit genes were identified in the genome (version 1.91) by searching for the identified mapped MCOT models in the WebApollo system hosted at Boyce Thompson Institute. Multiple alignments of the predicted *D. citri* MCOT proteins, other gene model sequences, and insect V-ATPase orthologs were performed using Muscle (<http://www.ebi.ac.uk/Tools/msa/muscle/>). Further analysis using RNASeq reads, Illumina DNaseq reads, StringTie models, and PacBio IsoSeq models were used to manually annotate the final V-ATPase gene models. Manually annotated V-ATPase gene models were then integrated into the v2.0 Official Gene Set. V-ATPase genes were verified in WebApollo through analysis using Augustus models,

Mikado transcriptome, SwissProt proteins, and SNAP prediction models. In the v2.0 *D. citri* genome, a paralog of subunit D necessary for the catalytic domain was discovered and will become part of the future v2.1 genome. Reciprocal BLASTp of manually annotated v2.0 V-ATPase genes were performed at NCBI comparing the Insecta taxid. Insect orthologs from *Acyrtosiphon pisum*, *Bemisia tabaci* (whitefly), *Aedes aegypti* (Yellow Fever mosquito), *Apis mellifera* (honey bee), *Tribolium castaneum* (red flour beetle) and *Drosophila melanogaster* (fruit fly) were obtained by reciprocal BLASTp analysis of the non-redundant protein database at NCBI. A neighbor-joining phylogenetic tree using Poisson correction method and 1000 replicate bootstrap test was constructed using full-length protein sequences in MEGA7 for the transmembrane complex, the catalytic complex, and the accessory S subunit, respectively.

## Results and Conclusions:

All 13 subunits required to build a single Vacuolar ATP synthase enzyme were annotated in *Diaphorina citri*, the Asian citrus psyllid (ACP). There were no additional subunits found in *D. citri*, as there are in metazoans. Although insects are known to have the 13 orthologous proteins, there is a variation in the gene copy number amongst different species. A selection of insects from the orders of Hemiptera, Coleoptera, Diptera, and Hymenoptera were obtained for gene copy comparison in tables 1, 2, and 3. The transmembrane domain subunits V0-a, V0-b, V0-e; the catalytic domain subunits V1-A, V1-C, V1-D, V1-G; and the accessory S subunit all show variation in copy number. Other than V1-D and V1-G, the three Hemipterans (*D. citri*, *A. pisum*, and *B. tabaci*) do maintain the same paralog number for those respective genes, as compared to the other orders. This variation in copy number is interesting in contrast to the single copy genes V0-c, V0-d, V1-B, V1-E, V1-F, and V1-H that maintain only one gene copy across all Insecta orders found in tables 1, 2, and 3. Various V-ATPase subunits have been studied in plants, animals, fungi, and insects, and certain genes have been highlighted for their functional versatility in serving cell needs; for example, yeast and mammals have numerous gene copies and isoforms of the transmembrane proteolipid subunit a to serve various functions involving vacuoles, the Golgi, neurons, osteoclasts, and epididymal cells (Maxson and Grinstein 2014). *D. citri* has two copies of subunit a, like *A. pisum* and *B. tabaci*, whereas *D. melanogaster* has 5 copies of this gene. In *D. citri*, paralogs of the subunits V0-a, V1-D, and V1-G were found, and they maintain differences in their amino acid sequences.

|                                | V0-a | V0-b | V0-c | V0-d | V0-e |
|--------------------------------|------|------|------|------|------|
| <i>Diaphorina citri</i>        | 2    | 1    | 1    | 1    | 1    |
| <i>Acyrtosiphon pisum</i>      | 2    | 1    | 1    | 1    | 1    |
| <i>Tribolium castaneum</i>     | 2    | 2    | 1    | 1    | 2    |
| <i>Drosophila melanogaster</i> | 5    | 2    | 1    | 1    | 4    |
| <i>Aedes aegypti</i>           | 3    | 1    | 1    | 1    | 2    |
| <i>Apis mellifera</i>          | 2    | 1    | 1    | 1    | 2    |
| <i>Bemisia tabaci</i>          | 2    | 1    | 1    | 1    | 1    |

Table 1: Gene copy comparison of V-ATPase transmembrane genes in *D. citri* and orthologous insect genes.

|                                | V1-A | V1-B | V1-C | V1-D | V1-E | V1-F | V1-G | V1-H |
|--------------------------------|------|------|------|------|------|------|------|------|
| <i>Diaphorina citri</i>        | 1    | 1    | 1    | 2    | 1    | 1    | 2    | 1    |
| <i>Acyrtosiphon pisum</i>      | 1    | 1    | 1    | 2    | 1    | 1    | 2    | 1    |
| <i>Tribolium castaneum</i>     | 1    | 1    | 1    | 3    | 1    | 1    | 2    | 1    |
| <i>Drosophila melanogaster</i> | 2    | 1    | 1    | 3    | 1    | 1    | 1    | 1    |
| <i>Aedes aegypti</i>           | 1    | 1    | 2    | 2    | 1    | 1    | 3    | 1    |
| <i>Apis mellifera</i>          | 1    | 1    | 1    | 2    | 1    | 1    | 1    | 1    |
| <i>Bemisia tabaci</i>          | 1    | 1    | 1    | 1    | 1    | 1    | 1    | 1    |

Table 2: Gene copy comparison of V-ATPase catalytic genes in *D. citri* and orthologous insect genes.

|                                | Accessory S |
|--------------------------------|-------------|
| <i>Diaphorina citri</i>        | 1           |
| <i>Acyrtosiphon pisum</i>      | 1           |
| <i>Tribolium castaneum</i>     | 2           |
| <i>Drosophila melanogaster</i> | 2           |
| <i>Aedes aegypti</i>           | 2           |
| <i>Apis mellifera</i>          | 1           |
| <i>Bemisia tabaci</i>          | 1           |

Table 3: Gene copy comparison of V-ATPase Accessory S gene in *D. citri* and orthologous insect genes.

Tables 4, 5, and 6 show results of protein BLAST analysis comparing the same insects as found above. Other than the accessory S protein, all subunits share relatively high identity, 54-94%, amongst individual pairwise alignments with each *D. citri* sequence. In contrast, the sequence identities 24-33% of accessory S protein show the highest gene divergence when comparing *D. citri* to other insects, see table 6. For the transmembrane domain subunits in table 4, proteolipid V0-c maintains some of the highest percentages of sequence identity, reflecting the importance of the protein function to form the c-ring that rotates and ultimately translocates protons across various membranes (Maxson and Grinstein 2014). This is supported in table 1, in which a single gene copy for V0-c is maintained across different orders of insects. For the catalytic domain subunits in table 5, V1-A and V1-B maintain the highest percentages of sequence identity, consistent with the importance of their function of containing the ATP binding sites at the V1-A/ V1-B protein interface. Apart from *Drosophila*, subunits V1-A and V1-B also maintain single copies of these two genes across different orders of insects, supporting their conserved nature as compared to other subunits in this enzyme.

| <i>D. citri</i> |           | <i>A. pisum</i> | <i>T. castaneum</i> | <i>D. melanogaster</i> | <i>A. aegypti</i> | <i>A. mellifera</i> | <i>B. tabaci</i> |
|-----------------|-----------|-----------------|---------------------|------------------------|-------------------|---------------------|------------------|
| <b>V0-a1</b>    | Accession | XP_008187043.1  | XP_968579.1         | NP_650722.1            | XP_021706364.1    | XP_006565533.1      | XP_018903507.1   |
|                 | Bit score | 1332            | 1128                | 1151                   | 1217              | 1166                | 1312             |
|                 | QC        | 99%             | 100%                | 99%                    | 99%               | 99%                 | 100%             |
|                 | Identity  | 75%             | 67%                 | 66%                    | 70%               | 69%                 | 73%              |
| <b>V0-a2</b>    | Accession | XP_008183003.1  | XP_008200805.1      | NP_001163768.1         | XP_021693137.1    | XP_016769523.1      | XP_018913654.1   |
|                 | Bit score | 720             | 689                 | 654                    | 728               | 742                 | 692              |
|                 | QC        | 100%            | 100%                | 100%                   | 100%              | 100%                | 100%             |
|                 | Identity  | 61%             | 60%                 | 60%                    | 62%               | 62%                 | 60%              |

|             |           |                |             |                |                |                |                |
|-------------|-----------|----------------|-------------|----------------|----------------|----------------|----------------|
| <b>VO-b</b> | Accession | NP_001155679.1 | XP_975026.1 | NP_652010.1    | XP_001662256.1 | XP_392599.1    | XP_018909463.1 |
|             | Bit score | 294            | 260         | 270            | 275            | 300            | 283            |
|             | QC        | 99%            | 99%         | 99%            | 99%            | 99%            | 99%            |
|             | Identity  | 74%            | 70%         | 73%            | 74%            | 76%            | 73%            |
| <b>VO-c</b> | Accession | NP_001155531.1 | XP_967959.1 | NP_476801.1    | XP_001654757.1 | NP_001011570.1 | XP_018897791.1 |
|             | Bit score | 268            | 258         | 271            | 267            | 259            | 250            |
|             | QC        | 98%            | 98%         | 99%            | 98%            | 98%            | 99%            |
|             | Identity  | 92%            | 90%         | 92%            | 93%            | 89%            | 87%            |
| <b>VO-d</b> | Accession | NP_001191854.1 | XP_974905.1 | NP_570080.1    | XP_001661299.1 | XP_393438.2    | XP_018903442.1 |
|             | Bit score | 656            | 671         | 661            | 677            | 679            | 669            |
|             | QC        | 99%            | 100%        | 99%            | 100%           | 100%           | 100%           |
|             | Identity  | 90%            | 92%         | 90%            | 92%            | 93%            | 92%            |
| <b>VO-e</b> | Accession | XP_003242132.1 | XP_971898.1 | NP_001097499.1 | XP_011493566.1 | XP_624787.1    | XP_018909271.1 |
|             | Bit score | 127            | 123         | 106            | 133            | 127            | 119            |
|             | QC        | 96%            | 94%         | 96%            | 100%           | 94%            | 96%            |
|             | Identity  | 70%            | 73%         | 59%            | 71%            | 71%            | 71%            |

Table 4: Bit score, query coverage, and identity results from protein BLAST analysis of annotated *D. citri* V-ATPase transmembrane subunit genes to their presumptive orthologs.

| <i>D. citri</i> |           | <i>A. pisum</i> | <i>T. castaneum</i> | <i>D. melanogaster</i> | <i>A. aegypti</i> | <i>A. mellifera</i> | <i>B. tabaci</i> |
|-----------------|-----------|-----------------|---------------------|------------------------|-------------------|---------------------|------------------|
| <b>V1-A</b>     | Accession | XP_008179407.1  | XP_976188.1         | NP_652004.2            | XP_021709029.1    | XP_623495.1         | XP_018897790.1   |
|                 | Bit score | 1176            | 1167                | 1162                   | 1168              | 1174                | 1187             |
|                 | QC        | 99%             | 99%                 | 99%                    | 100%              | 99%                 | 99%              |
|                 | Identity  | 92%             | 90%                 | 90%                    | 91%               | 91%                 | 92%              |
| <b>V1-B</b>     | Accession | XP_003246082.1  | XP_967844.1         | NP_476908.1            | XP_001651458.1    | XP_624112.1         | XP_018896879.1   |
|                 | Bit score | 966             | 966                 | 966                    | 968               | 955                 | 976              |
|                 | QC        | 98%             | 98%                 | 98%                    | 98%               | 98%                 | 99%              |
|                 | Identity  | 94%             | 93%                 | 94%                    | 94%               | 93%                 | 94%              |
| <b>V1-C</b>     | Accession | XP_001946227.1  | XP_008195426.1      | NP_477266.1            | XP_021695404.1    | XP_006562159.1      | XP_018915661.1   |
|                 | Bit score | 702             | 671                 | 645                    | 671               | 648                 | 653              |
|                 | QC        | 99%             | 98%                 | 98%                    | 99%               | 99%                 | 99%              |
|                 | Identity  | 87%             | 82%                 | 79%                    | 82%               | 80%                 | 83%              |
| <b>V1-D1</b>    | Accession | NP_001119691.1  | XP_975872.1         | NP_651987.1            | XP_001660426.1    | XP_394769.2         | XP_018904914.1   |
|                 | Bit score | 246             | 244                 | 257                    | 247               | 238                 | 253              |
|                 | QC        | 93%             | 86%                 | 86%                    | 86%               | 84%                 | 88%              |
|                 | Identity  | 54%             | 56%                 | 58%                    | 56%               | 56%                 | 57%              |
| <b>V1-D2</b>    | Accession | NP_001119691.1  | XP_975872.1         | NP_651987.1            | XP_001660426.1    | XP_394769.2         | XP_018904914.1   |
|                 | Bit score | 420             | 426                 | 408                    | 401               | 404                 | 423              |
|                 | QC        | 100%            | 100%                | 100%                   | 100%              | 100%                | 100%             |
|                 | Identity  | 87%             | 87%                 | 83%                    | 81%               | 87%                 | 86%              |
| <b>V1-E</b>     | Accession | NP_001155650.1  | XP_970621.1         | NP_524237.1            | XP_001655825.1    | XP_625098.1         | XP_018901912.1   |
|                 | Bit score | 301             | 341                 | 325                    | 335               | 336                 | 336              |
|                 | QC        | 99%             | 100%                | 100%                   | 100%              | 100%                | 100%             |
|                 | Identity  | 73%             | 73%                 | 71%                    | 71%               | 73%                 | 72%              |
| <b>V1-F</b>     | Accession | NP_001119690.1  | XP_975016.1         | NP_476969.1            | XP_001655376.1    | XP_624852.1         | XP_018905603.1   |
|                 | Bit score | 223             | 216                 | 217                    | 216               | 230                 | 227              |
|                 | QC        | 98%             | 98%                 | 98%                    | 100%              | 98%                 | 98%              |
|                 | Identity  | 85%             | 83%                 | 81%                    | 82%               | 89%                 | 89%              |
| <b>V1-G</b>     | Accession | NP_001119628.1  | XP_973974.1         | NP_477437.1            | XP_001652605.1    | XP_624346.1         | XP_018908074.1   |
|                 | Bit score | 184             | 173                 | 154                    | 171               | 180                 | 188              |
|                 | QC        | 99%             | 98%                 | 96%                    | 96%               | 98%                 | 100%             |
|                 | Identity  | 80%             | 74%                 | 66%                    | 74%               | 77%                 | 81               |
| <b>V1-H</b>     | Accession | XP_001949116.3  | XP_966693.3         | NP_523585.2            | XP_001652018.1    | XP_003251675.1      | XP_018904009.1   |
|                 | Bit score | 763             | 745                 | 679                    | 719               | 741                 | 779              |
|                 | QC        | 98%             | 100%                | 96%                    | 98%               | 98%                 | 99%              |
|                 | Identity  | 75%             | 75%                 | 69%                    | 71%               | 76%                 | 78%              |

Table 5: Bit score, query coverage, and identity results from protein BLAST analysis of annotated *D. citri* V-ATPase catalytic subunit genes to their presumptive orthologs.

| <i>D. citri</i> |           | <i>A. pisum</i> | <i>T. castaneum</i> | <i>D. melanogaster</i> | <i>A. aegypti</i> | <i>A. mellifera</i> | <i>B. tabaci</i> |
|-----------------|-----------|-----------------|---------------------|------------------------|-------------------|---------------------|------------------|
| <b>Acc-S</b>    | Accession | NP_001162140.1  | XP_974187.2         | NP_610470.1            | XP_001658652.1    | XP_001121483.2      | XP_018899028.1   |
|                 | Bit score | 136             | 114                 | 77.4                   | 92.4              | 90.1                | 177              |
|                 | QC        | 83%             | 100%                | 96%                    | 95%               | 93%                 | 97%              |
|                 | Identity  | 31%             | 27%                 | 25%                    | 24%               | 27%                 | 33%              |

Table 6: Bit score, query coverage, and identity results from protein BLAST analysis of annotated *D. citri* V-ATPase accessory S subunit gene to its presumptive orthologs.

Figures 1, 2, and 3 depict phylogenetic analyses for the transmembrane and catalytic domains of V-ATPase, respectively, and one for the accessory S protein. The individual V-ATPase subunits form clades, regardless of insect species. These clades also have the highest bootstrap values. This confirms previous research that describes the enzyme as ancient and highly conserved. The evolution of V-ATPase has been analyzed for gene duplication and divergence from other ATP synthases, like F- and A-ATPase, which occur across the three domains of life (Hilario and Gogarten 1998). Figures 1, 2, and 3 all agree and suggest that the V-ATPase enzyme utilized in these particular insects existed in their common ancestor before they diverged into their respective species. The proteolipid subunit V0-c has the shortest branch lengths in figure 1, consistent with tables 1 and 4. Subunit c, which is required to form the critical c-ring rotor of V-ATPase, appears to have diverged the least when comparing the other transmembrane domain subunits and in other insect species. In contrast, subunit V0-e has diverged the most in figure 1's phylogenetic tree. This is consistent with the variable gene copy number observed across different orders of insects and the lower percentages of protein sequence identity seen in *D. citri* pairwise alignments, tables 1 and 4, respectively. In addition, the function of subunit V0-e is still unknown for the transmembrane domain subunits (Beyenbach and Wieczorek 2006).

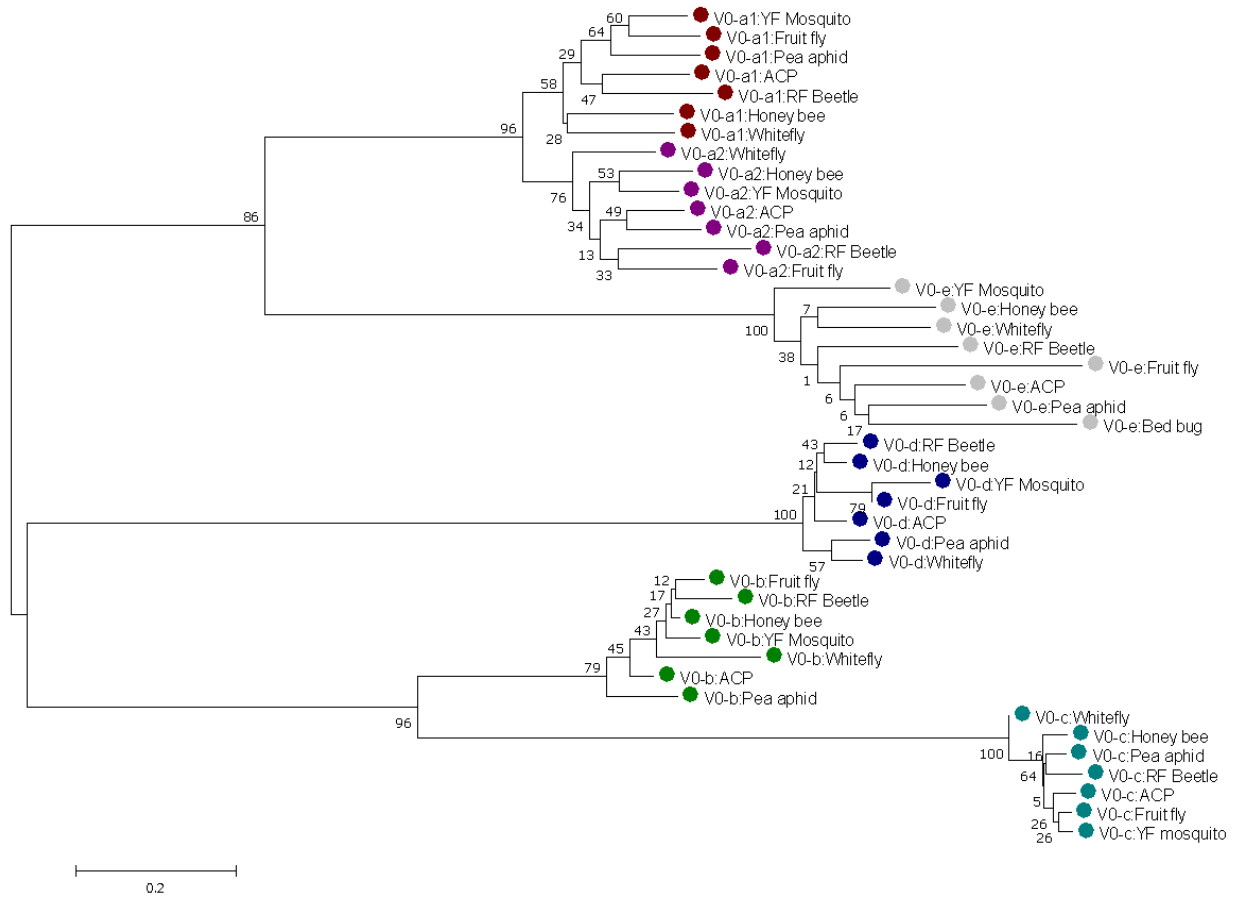

Figure 1: Phylogenetic tree of representative insect V-ATPase transmembrane orthologs.

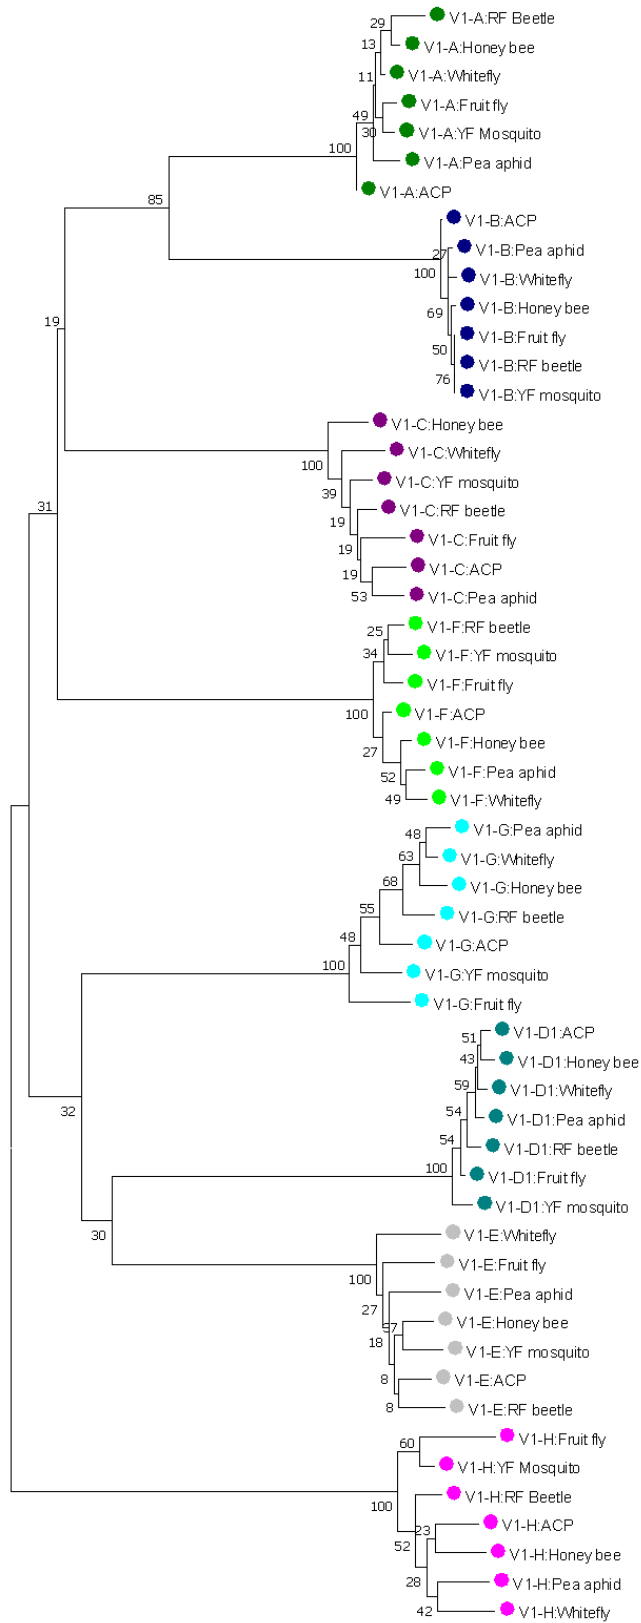

Figure 2: Phylogenetic tree of representative insect V-ATPase catalytic orthologs.

Figure 3 shows the evolutionary relatedness of the *D. citri* accessory S protein. It is a relatively new protein critically associated with the assembly of V-ATPase and is still being studied (Miles *et al.* 2017). For this select group of insect species, accessory S groups and forms a clade with the other hemipteran protein sequences. The accessory S subunit is a variable gene when comparing V-ATPase across the domains of life, a paralog variability also seen among different orders of insects, see table 3 (Miles *et al.* 2017, Forgac 2007). Accessory S has diverged the most of all the V-ATPase subunits in *D. citri* compared to other insects. This is seen in the figure 3 phylogenetic tree and is denoted with longer branch lengths. This divergence is also supported in the values of the pairwise alignments found in table 6, in which the protein shares very little sequence identity across the query lengths, respectively.

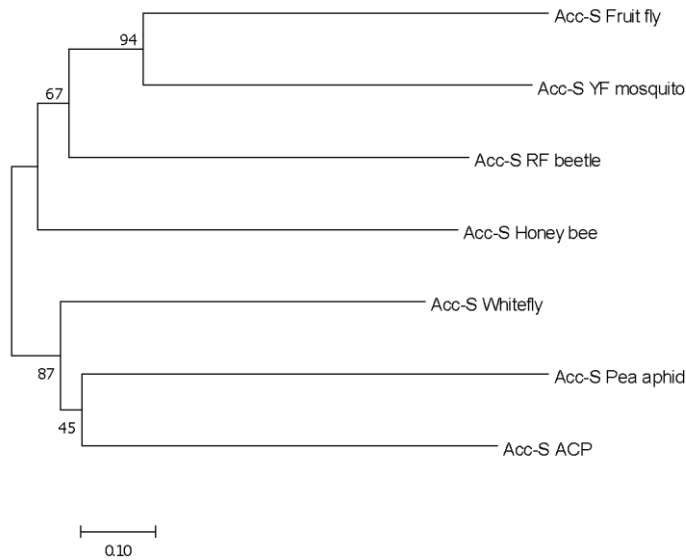

Figure 3: Phylogenetic tree of representative insect V-ATPase accessory S orthologs.



## References:

- Badillo-Vargas IE, Rotenberg D, Schneweis BA, Whitfield AE. 2015. RNA interference tools for the western flower thrips, *Frankliniella occidentalis*. *J Insect Physiol.* 76:36-46.
- Beyenbach KW and Wieczorek H. 2006. The V-type H<sup>+</sup> ATPase: molecular structure and function, physiological roles and regulation. *J Experim Bio.* 209:577-589.
- Chavez C, Bowman EJ, Reidling JC, Haw KH, Bowman BJ. 2006. Analysis of strains with mutations in six genes encoding subunits of the V-ATPase: eukaryotes differ in the composition of the V<sub>0</sub> sector of the enzyme. *J Biol Chem.* 281(37):27052-62.
- Dow JAT, Davies S, Guo Y, Graham S, Finbow ME, Kaiser K. 1997. Molecular genetic analysis of V-ATPase function in *Drosophila melanogaster*. *J Experim Bio.* 200:237-245.
- Forgac M. 2007. Vacuolar ATPases: rotary proton pumps in physiology and pathophysiology. *Nat Rev Mol Cell Biol.* 11:917-29.
- Hilario E and Gogarten JP. 1998. The prokaryote-to-eukaryote transition reflected in the evolution of the V/F/A-ATPase catalytic and proteolipid subunits. *J Mol Evo.* 46:703–715.
- Hosmani PS, Shippy T, Miller S, Benoit JB, Munoz-Torres M, Flores-Gonzalez M, et al. (2019) A quick guide for student-driven community genome annotation. *PLoS Comput Biol* 15(4): e1006682. <https://doi.org/10.1371/journal.pcbi.1006682>
- Maxson ME and Grinstein S. 2014. The vacuolar-type H<sup>+</sup>-ATPase at a glance – more than a proton pump. *J Cell Sci.* 127:4987–4993.
- Miles AL, Burr SP, Grice GL, Nathan JA. 2017. The vacuolar-ATPase complex and assembly factors, TMEM199 and CCDC115, control HIF1 $\alpha$  prolyl hydroxylation by regulating cellular iron levels. *eLIFE* [Internet]. [cited 2018 Jan 18]; 6:e22693. Available from: <https://elifesciences.org/articles/22693> DOI: 10.7554/eLife.22693
- Nelson N, Perzov N, Cohen A, Hagai K, Padler V, Nelson H. 2000. The cellular biology of proton-motive force generation by V-ATPases. *J Exp Bio.* 203:89-95.
